# Supplementary material for: Characterization and Treatment Responsiveness of Genetically Engineered Ornithine Transcarbamylase-Deficient Pig
Source: MDPI journal article supplement (doi:10.3390/jcm10153226), 2021-07-22
Supplement: s1 [file s1]

## Supplementary Materials

**Table S1.** Pregnancy and delivery outcomes for ornithine transcarbamylase deficient (OTCD) carrier female pigs.

| Mother pig ID <sup>1</sup>          | K76      | K77      | K77(2)   | K78(2)   | K79      | K80      | K96      | K96(2)   | K96(3)   | K97      | K100     | K103     | K103(2)  | K106     | K106(2)  | K135     | W321     | W328     | Total No. |
|-------------------------------------|----------|----------|----------|----------|----------|----------|----------|----------|----------|----------|----------|----------|----------|----------|----------|----------|----------|----------|-----------|
| Gestation length, day               | 112      | 112      | 111      | 111      | 114      | 112      | 106      | 109      | 111      | 106      | 112      | 110      | 111      | 112      | 111      | 112      | 114      | 112      |           |
| Divergence <sup>2</sup>             | -2       | -2       | -3       | -3       | 0        | -2       | -8       | -5       | -3       | -8       | -2       | -4       | -5       | -2       | -3       | -2       | 0        | -2       |           |
| Mode of delivery <sup>3</sup>       | N        | N        | N        | H        | N        | N        | N        | N        | H        | H        | N        | N        | N        | N        | H        | O        | O        | H        |           |
| Total No. of piglets                | 13       | 7        | 8        | 11       | 7        | 11       | 12       | 9        | 13       | 10       | 8        | 11       | 6        | 11       | 11       | 7        | 4        | 14       | 173       |
| No. of live piglets                 | 9        | 7        | 8        | 10       | 5        | 11       | 9        | 8        | 12       | 10       | 8        | 10       | 6        | 10       | 10       | 7        | 4        | 9        | 153       |
| <b>Live, male, OTCD<sup>4</sup></b> | <b>2</b> | <b>1</b> | <b>1</b> | <b>0</b> | <b>0</b> | <b>1</b> | <b>1</b> | <b>2</b> | <b>1</b> | <b>2</b> | <b>1</b> | <b>2</b> | <b>1</b> | <b>0</b> | <b>1</b> | <b>2</b> | <b>1</b> | <b>2</b> | <b>21</b> |
| Live, Male, WT <sup>5</sup>         | 4        | 2        | 3        | 2        | 1        | 3        | 1        | 2        | 1        | 4        | 1        | 6        | 1        | 3        | 1        | 2        | 1        | 2        | 39        |
| Live, female, carrier               | 0        | 2        | 2        | 3        | 4        | 3        | 3        | 2        | 6        | 4        | 5        | 1        | 1        | 2        | 1        | 3        | 2        | 2        | 46        |
| Live, female, WT                    | 3        | 2        | 3        | 5        | 0        | 4        | 4        | 2        | 4        | 0        | 1        | 1        | 3        | 5        | 3        | 1        | 0        | 2        | 42        |
| No. of dead piglets                 | 4        | 0        | 0        | 1        | 2        | 0        | 3        | 1        | 1        | 0        | 0        | 1        | 0        | 1        | 1        | 0        | 0        | 5        | 20        |
| <b>Dead, male, OTCD</b>             | <b>4</b> | <b>0</b> | <b>0</b> | <b>1</b> | <b>2</b> | <b>0</b> | <b>3</b> | <b>1</b> | <b>1</b> | <b>0</b> | <b>0</b> | <b>1</b> | <b>0</b> | <b>0</b> | <b>1</b> | <b>0</b> | <b>0</b> | <b>5</b> | <b>19</b> |
| Dead, male, WT                      | 0        | 0        | 0        | 0        | 0        | 0        | 0        | 0        | 0        | 0        | 0        | 0        | 0        | 1        | 0        | 0        | 0        | 0        | 1         |
| Dead, female, carrier               | 0        | 0        | 0        | 0        | 0        | 0        | 0        | 0        | 0        | 0        | 0        | 0        | 0        | 0        | 0        | 0        | 0        | 0        | 0         |
| Dead, female, WT                    | 0        | 0        | 0        | 0        | 0        | 0        | 0        | 0        | 0        | 0        | 0        | 0        | 0        | 0        | 0        | 0        | 0        | 0        | 0         |

<sup>1</sup>Number in parenthesis denotes the number of delivery times; <sup>2</sup>Divergence from standard gestation period (114 days [7]); <sup>3</sup>N; normal delivery, H; hysterotomy after the sign of delivery, O; with oxytocic treatment; <sup>4</sup>OTCD; Ornithine transcarbamylase deficient; <sup>5</sup>WT; wild type; <sup>6</sup>Average gestation length of total cases (n=18) and cases of normal delivery (n=11) were both 111 days.
